# Supplementary material
Source: HighWire-hosted journal article supplement (https://bmjopen.bmj.com/content/13/9/e071828)
Supplement: inline-supplementary-material-1 [file inline-supplementary-material-1.pdf]

|   | Title/Author                                                                                                                                                                                                     | Method       | Setting                  | Partisipants           | Country      | Quality assesment |
|---|------------------------------------------------------------------------------------------------------------------------------------------------------------------------------------------------------------------|--------------|--------------------------|------------------------|--------------|-------------------|
| 1 | To be or not to be in the ward': The Impact of Covid-19 on the Role of Hospital-Based Clinical Pharmacists - A Qualitative Study (Cheong, 2020)                                                                  | Qualitative  | Hospital                 | Pharmacists            | Malaysia     | High              |
| 2 | A National Study of Community Health Centers' Readiness to Address COVID-19 (Damian et al., 2021)                                                                                                                | Mixed method | Community health centers | Primary care employees | USA          | High              |
| 3 | A qualitative examination of quarantine work experience of nurses in Saudi Arabia (Alhamidi et al., 2020)                                                                                                        | Qualitative  | Quarantine centers       | Nurses                 | Saudi Arabia | High              |
| 4 | A qualitative study of physician perceptions and experiences of caring for critically ill patients in the context of resource strain during the first wave of the COVID-19 pandemic (Parsons Leigh et al., 2021) | Qualitative  | ICU                      | Physicians             | Canada       | High              |
| 5 | A Qualitative Study of Primary Care Physicians' Experiences With Telemedicine During COVID-19 (Gomez et al., 2021)                                                                                               | Qualitative  | Primary care             |                        | USA          | High              |

|    |                                                                                                                                                                             |              |                         |                                                                                                                                                               |                               |      |
|----|-----------------------------------------------------------------------------------------------------------------------------------------------------------------------------|--------------|-------------------------|---------------------------------------------------------------------------------------------------------------------------------------------------------------|-------------------------------|------|
| 6  | Adapting to the unexpected: Problematic work situations and resilience strategies in healthcare institutions during the COVID-19 pandemic's first wave (Juvet et al., 2021) | Mixed method | Hospital                | Nurses and other caregivers                                                                                                                                   | Switzerland                   | High |
| 7  | An Experience of Otorhinolaryngologists as Frontline Worker with Novel Coronavirus: A Qualitative Analysis (Kaur et al., 2021)                                              | Qualitative  | Hospital                | Otorhinolaryngologists                                                                                                                                        | India                         | High |
| 8  | At Home, with Care": Lessons from New York City Home-based Primary Care Practices Managing COVID-19 (Franzosa et al., 2021)                                                 | Qualitative  | Home-based primary care | HBPC leadership including clinical/medical directors, program managers, nurse practitioners/nursing coordinators, and social workers/social work coordinators | USA                           | High |
| 9  | Changes to care delivery at nine international pediatric diabetes clinics in response to the COVID-19 global pandemic (Sartean et al., 2021)                                | Qualitative  | Diabetes clinics        | Healthcare providers                                                                                                                                          | USA, Australia, Sweden, India | Low  |
| 10 | Clinician Perspectives on Caring for Dying Patients During the Pandemic: A Mixed-Methods Study (Cook et al., 2021)                                                          | Mixed method | Hospital                | Patients, family members, clinicians                                                                                                                          | Canada                        | High |

|    |                                                                                                                                                          |              |                                               |                                                                               |             |      |
|----|----------------------------------------------------------------------------------------------------------------------------------------------------------|--------------|-----------------------------------------------|-------------------------------------------------------------------------------|-------------|------|
| 11 | Clinician perspectives on methadone service delivery and the use of telemedicine during the COVID-19 pandemic: A qualitative study (Hunter et al., 2021) | Qualitative  | Methadone clinic                              | physicians, physician assistants, and nurse practitioner                      | USA         | High |
| 12 | Covid-19 changes to maternity care: Experiences of Australian doctors (Szabo et al., 2021)                                                               | Mixed method | Maternity wards                               | Doctors                                                                       | Australia   | High |
| 13 | COVID-19 Impact on Healthcare and Supportive Services for People Who Use Drugs (PWUDs) in Malaysia (Vicknasingam et al., 2021)                           | Qualitative  | Healthcare and non-governmental organizations | Medical personnel of methadone maintenance treatment programs and HIV clinics | Malaysia    | Low  |
| 14 | COVID-19: How did community pharmacies get through the first wave? (Gregory & Austin, 2020)                                                              | Qualitative  | Pharmacies                                    | Pharmacists                                                                   | Canada      | Low  |
| 15 | Delivering Virtual Cancer Rehabilitation Programming During the First 90 Days of the COVID-19 Pandemic: A Multimethod Study (Lopez et al., 2021)         | Multi method | Cancer center                                 | Oncology healthcare providers                                                 | Canada      | High |
| 16 | Effect of COVID-19 on health system integration in the Netherlands: a mixed-methods study (Minderhout et al., 2021)                                      | Mixed method | Acute care                                    | Clinicians, managers, administrators, and insurance company representatives   | Netherlands | High |
| 17 | Emerging Palliative Care Innovations in the ED: A                                                                                                        | Qualitative  | Emergency department                          | Emergency department and Palliative care clinicians                           | USA         | High |

|    |                                                                                                                                              |              |                                        |                                                 |            |      |
|----|----------------------------------------------------------------------------------------------------------------------------------------------|--------------|----------------------------------------|-------------------------------------------------|------------|------|
|    | Qualitative Analysis of Programmatic Elements During the COVID-19 Pandemic (Aaronsen et al., 2021)                                           |              |                                        |                                                 |            |      |
| 18 | Feasibility of an online platform delivery of pulmonary rehabilitation for individuals with chronic respiratory disease (Lewis et al., 2021) | Mixed method | Community Respiratory Team             | physiotherapist, nurse and exercise instructor  | UK         | Low  |
| 19 | Front-line nurses' responses to organisational changes during the COVID-19 in Spain: A qualitative rapid appraisal (2021)                    | Qualitative  | Hospital and community health settings | Nurses                                          | Spain      | High |
| 20 | Healthcare providers' challenges during the coronavirus disease (COVID-19) pandemic: A qualitative approach (Ness et al., 2021)              | Qualitative  | Hospital                               | Nurses                                          | USA        | High |
| 21 | Healthcare workers during the COVID-19 pandemic: Experiences of doctors and nurses in Bangladesh (Hussain et al., 2021)                      | Qualitative  | Hospital                               | Doctors and nurses                              | Bangladesh | High |
| 22 | Home palliative care professionals perception of challenges during the Covid-19 outbreak: A qualitative study (Franchini et al., 2021)       | Qualitative  | An Italian non-profit organization     | Home care professionals (nurses and physicians) | Italy      | High |

|    |                                                                                                                                                                                       |             |                                          |                                                                                                                                  |         |      |
|----|---------------------------------------------------------------------------------------------------------------------------------------------------------------------------------------|-------------|------------------------------------------|----------------------------------------------------------------------------------------------------------------------------------|---------|------|
| 23 | How the experience of medical assistance in dying changed during the COVID-19 pandemic in Canada: a qualitative study of providers                                                    | Qualitative | Providers of Medical assistance in dying | Physicians and nurse practitioners                                                                                               | Canada  | High |
| 24 | Impact of the COVID-19 pandemic on the core functions of primary care: will the cure be worse than the disease? A qualitative interview study in Flemish GPs (Verhoeven et al., 2020) | Qualitative | GP practices                             | GPs                                                                                                                              | Belgium | High |
| 25 | Inpatient Diabetes Care during the COVID-19 Pandemic: A Diabetes UK rapid review of health care professionals' experiences using semi-structured interviews (Burr et al., 2021)       | Qualitative | Hospital                                 | Diabetes consultants, diabetes specialist nurses and allied health professionals involved in delivery of diabetes inpatient care | UK      | Low  |
| 26 | Lessons from Italian front-line nurses' experiences during the COVID-19 pandemic: A qualitative descriptive study (Catania et al., 2021)                                              | Qualitative | Hospital                                 | Nurses                                                                                                                           | Italia  | High |
| 27 | Management and patient safety of complex elderly patients in primary care during the COVID-19 pandemic in the UK—Qualitative Assessment (Alboksmaty et al., 2021)                     | Qualitative | Primary care                             | GPs                                                                                                                              | UK      | High |

|    |                                                                                                                                                                                        |              |                                                      |                                                            |           |      |
|----|----------------------------------------------------------------------------------------------------------------------------------------------------------------------------------------|--------------|------------------------------------------------------|------------------------------------------------------------|-----------|------|
|    |                                                                                                                                                                                        |              |                                                      |                                                            |           |      |
| 28 | Midwives' experiences of providing maternity care during the COVID-19 pandemic in Australia (Bradfield et al., 2022)                                                                   | Mixed method | Hospital                                             | Midwives                                                   | Australia | High |
| 29 | Missing the human connection: A rapid appraisal of healthcare workers' perceptions and experiences of providing palliative care during the COVID-19 pandemic (Mitchinson et al., 2021) | Qualitative  | Hospital                                             | Healthcare workers (e.g., dietitians, pharmacists, nurses) | UK        | High |
| 30 | Nurses' ethical challenges caring for people with COVID-19: A qualitative study (Jia et al., 2021)                                                                                     | Qualitative  | Hospital                                             | Nurses                                                     | China     | High |
| 31 | Nurses' experiences of being recruited and transferred to a new sub-intensive care unit devoted to COVID-19 patients (Danielis et al., 2021)                                           | Qualitative  | Hospital (intensive care unit for COVID-19 patients) | Nurses                                                     | Italy     | High |
| 32 | Nurses' experiences regarding shift patterns in isolation wards during the COVID-19 pandemic in China: A qualitative study (Gao et al., 2020)                                          | Qualitative  | Hospital                                             | Nurses                                                     | China     | High |
| 33 | Nursing home staff perceptions of challenges and coping strategies during COVID-19 pandemic in China                                                                                   | Qualitative  | Home care                                            | Nurses                                                     | China     | High |

|    |                                                                                                                                                                                       |             |                                                                  |                                 |                                                                                                              |      |
|----|---------------------------------------------------------------------------------------------------------------------------------------------------------------------------------------|-------------|------------------------------------------------------------------|---------------------------------|--------------------------------------------------------------------------------------------------------------|------|
|    | (Zhao et al., 2021)                                                                                                                                                                   |             |                                                                  |                                 |                                                                                                              |      |
| 34 | Nursing perspectives on care delivery during the early stages of the covid-19 pandemic: A qualitative study (Shroeder et al., 2020)                                                   | Qualitative | Urban academic medical center                                    | Nurses                          | USA                                                                                                          | High |
| 35 | Person-centered communication between healthcare professionals and COVID-19 infected older adults in acute care settings: Findings from Wuhan, China (Li et al., 2021)                | Qualitative | Hospital                                                         | Nurses and physicians           | China                                                                                                        | High |
| 36 | Preparedness of Our Emergency Department During the Coronavirus Disease Outbreak from the Nurses' Perspectives: A Qualitative Research Study (Hou et al., 2020)                       | Qualitative | Emergency department                                             | Nurses                          | China                                                                                                        | High |
| 37 | Preservation of Person-Centered Care Through Videoconferencing for Patient Follow-up During the COVID-19 Pandemic: Case Study of a Multidisciplinary Care Team (Silsand et al., 2021) | Qualitative | PACT team (transitional phase between hospital and primary care) | Healthcare workers in PACT team | Norway                                                                                                       | High |
| 38 | Provision of clinical pharmacy services during the COVID-19 pandemic: Experiences of pharmacists from 16 European countries Paudyal et al., 2021)                                     | Qualitative | Hospital, community pharmacy, primary care                       | Pharmacists                     | Belgium, Croatia, Czech Republic, Denmark, England, Estonia, France, Ireland, Netherlands, Portugal, Serbia, | High |

|    |                                                                                                                                                    |              |                   |                                                               |                                  |      |
|----|----------------------------------------------------------------------------------------------------------------------------------------------------|--------------|-------------------|---------------------------------------------------------------|----------------------------------|------|
|    |                                                                                                                                                    |              |                   |                                                               | Spain,<br>Switzerland,<br>Turkey |      |
| 39 | Rapid response system adaptations at 40 US hospitals during the COVID-19 pandemic (Mitchell et al., 2021)                                          | Mixed method | Hospitals         | Clinicians                                                    | USA                              | Low  |
| 40 | Resilience in the time of pandemic: The experience of community pharmacists during COVID-19 (Austin & Gregory, 2021)                               | Qualitative  | Pharmacies        | Pharmacists                                                   |                                  | High |
| 41 | The impact of COVID-19 on chronic care according to providers: a qualitative study among primary care practices in Belgium (Danhieux et al., 2020) | Qualitative  | Primary care      | Doctors, nurses, dieticians                                   | Belgium                          | High |
| 42 | Restructuring in a GP practice during the COVID- 19 pandemic – a focus-group study (Renaa & Brekke, 2021)                                          | Qualitative  | GP practise       | Nurses and medical secretaries                                | Norway                           | High |
| 43 | The Lived Experience of ICU Clinicians During the Coronavirus Disease 2019 Outbreak: A Qualitative Study (Kentish-Barnes et al., 2021)             | Qualitative  | ICU               | Physicians, nurses, nursing assistants, respiratory therapist | France                           | High |
| 44 | US Clinicians' Experiences and Perspectives on Resource Limitation and Patient Care During the COVID-19 Pandemic (Butler et al., 2020)             | Mixed method | Hospitals/clinics | Nurses, nurse practitioners, physicians                       | USA                              | High |
| 45 | Experiences of nursing students as healthcare aid during the COVID-19                                                                              | Qualitative  | Hospital          | Nursing students                                              | Spain                            | High |



|    |                                                                                                                                                                                                         |              |                                                                                                 |                             |                               |      |
|----|---------------------------------------------------------------------------------------------------------------------------------------------------------------------------------------------------------|--------------|-------------------------------------------------------------------------------------------------|-----------------------------|-------------------------------|------|
|    | pandemic in Spain: A phenomenological research study (Casafont et al., 2021)                                                                                                                            |              |                                                                                                 |                             |                               |      |
| 46 | Necessity is the mother of invention': Specialist palliative care service innovation and practice change in response to COVID-19. Results from a multinational survey (CovPall) (Dunleavy et al., 2021) | Mixed method | Inpatient palliative care units, home nursing services, hospital and home palliative care teams | Healthcare workers          | Europe, UK, rest of the world | High |
| 47 | The Resilience of Cardiac Care Through Virtualized Services During the COVID-19 Pandemic: Case Study of a Heart Function Clinic                                                                         | Qualitative  | Heart function clinic                                                                           | Patients, clinicians, staff | Canada                        | High |
